# Supplementary material for: Development of Efficient Genome-Reduction Tool Based on Cre/loxP System in Rhodococcus erythropolis
Source: MDPI journal article supplement (doi:10.3390/microorganisms11020268), 2023-01-19

## Supplementary Materials

### Development of efficient genome reduction tool based on Cre/*loxP* system in *Rhodococcus erythropolis*

by Watrau Kitagawa and Miyako Hata

**Table S1.** Bacterial strains and plasmids used in this study

**Table S2.** Primers used in this study

**Figure S1.** Determination of genome reduction target position (T1–T7) of *R. erythropolis* JCM 2895 by comparing genome sequence of four other *R. erythropolis* strains.

**Figure S2.** Cre recombination between chromosomal *loxLE* and plasmid *loxRE*.

**Table S1.** Bacterial strains and plasmids used in this study

| Strain or plasmid               | Relevant characteristic(s)                                                                                                                                      | Reference or origin                       |
|---------------------------------|-----------------------------------------------------------------------------------------------------------------------------------------------------------------|-------------------------------------------|
| <b>Strains</b>                  |                                                                                                                                                                 |                                           |
| <i>Rhodococcus</i> strains      |                                                                                                                                                                 |                                           |
| <i>R. erythropolis</i> JCM 6824 | Wild type, aurachin RE producer                                                                                                                                 | Ref. 65 & 38                              |
| <i>R. erythropolis</i> DRE      | Genome reduction derivative of JCM 6824                                                                                                                         | This study                                |
| <i>R. erythropolis</i> JCM 2895 | Wild type, antibiotic protein producer, containing 4 plasmids; pR09L01, pR09C01, pREC01, and pREC02                                                             | Ref. 39 & 28                              |
| <i>R. erythropolis</i> R0901    | pR09C01 cured strain of JCM2895                                                                                                                                 | This study                                |
| <i>R. erythropolis</i> R0902    | pR09L01 cured strain of R0901                                                                                                                                   | This study                                |
| <i>R. erythropolis</i> R0903    | pREC01 cured strain of R0902                                                                                                                                    | This study                                |
| <i>R. erythropolis</i> R0904    | pREC02 cured strain of R0903                                                                                                                                    | This study                                |
| <i>R. erythropolis</i> R0905    | Genome reduction derivative of R0904                                                                                                                            | This study                                |
| <i>R. erythropolis</i> R0906    | Genome reduction derivative of R0905                                                                                                                            | This study                                |
| <i>R. erythropolis</i> R0907    | Genome reduction derivative of R0906                                                                                                                            | This study                                |
| <i>R. erythropolis</i> R0908    | Genome reduction derivative of R0907                                                                                                                            | This study                                |
| <i>R. erythropolis</i> R0909    | Genome reduction derivative of R0908                                                                                                                            | This study                                |
| <i>R. erythropolis</i> R0910    | Genome reduction derivative of R0909                                                                                                                            | This study                                |
| <i>R. erythropolis</i> R0911    | Genome reduction derivative of R0910                                                                                                                            | This study                                |
| <i>E. coli</i> DH5α             | Host strain for cloning of DNA                                                                                                                                  | Nippon Gene                               |
| <b>Plasmids</b>                 |                                                                                                                                                                 |                                           |
| pBluescriptII KS                | Cloning vector, Amp <sup>r</sup>                                                                                                                                | Stratagene                                |
| pBS-aphII-loxLE                 | pBluescriptII KS derivative, <i>loxLE</i> , Km <sup>r</sup>                                                                                                     | This study                                |
| pK18mobsacB                     | Cloning vector, <i>mob</i> , <i>sacB</i> , Km <sup>r</sup>                                                                                                      | Ref. 56                                   |
| pK18mobsacB-loxLE               | pK18mobsacB with <i>loxLE</i>                                                                                                                                   | This study                                |
| pACYC184                        | Cloning vector, Cm <sup>r</sup> , Tet <sup>r</sup>                                                                                                              | Ref. 58                                   |
| pACYC-aac-loxRE                 | pACYC184 derivative, <i>loxRE</i> , Apr <sup>r</sup>                                                                                                            | This study                                |
| pCH-cre-loxRE                   | pACYC184 derivative, CH2.2 promoter (thiostrepton inducible), <i>cre</i> , <i>tipA</i> , <i>loxRE</i> , Apr <sup>r</sup> , Thio <sup>r</sup>                    | This study                                |
| pTip-QC2*                       | Expression vector for <i>Rhodococcus</i> sp., <i>tip</i> promoter (thiostrepton inducible), <i>tipA</i> , Cm <sup>r</sup> , Ap <sup>r</sup> , Thio <sup>r</sup> | Ref. 41 & 44                              |
| pTip-sacB-cre*                  | pTip-QC2 derivative, <i>cre</i> , <i>sacB</i> (3rd vector)                                                                                                      | This study                                |
| pTip-CH2.2*                     | Expression vector for <i>Rhodococcus</i> sp., CH2.2 promoter (thiostrepton inducible), <i>tipA</i> , Cm <sup>r</sup> , Ap <sup>r</sup> , Thio <sup>r</sup>      | Ref. 41                                   |
| pTH18cs1::cre                   | Cloning vector, Cm <sup>r</sup> , <i>cre</i> , used for <i>cre</i> source                                                                                       | Gift from Dr. H. Ikeda and Dr. M. Komatsu |
| pHN1237                         | Expression vector, Apr <sup>r</sup> , used for Apr source                                                                                                       | Ref. 59                                   |
| pK18R09CPD1                     | pK18mobsacB with a DNA fragment of pR09C01                                                                                                                      | This study                                |
| pK18R09LPD01                    | pK18mobsacB with a DNA fragment of pR09L01                                                                                                                      | This study                                |
| pK18R09REC01D                   | pK18mobsacB with a DNA fragment of pREC01                                                                                                                       | This study                                |
| pK18R09REC02D                   | pK18mobsacB with a DNA fragment of pREC02                                                                                                                       | This study                                |
| pBS-D95k-LE                     | pBS-aphII-loxLE with a DNA fragment of JCM 6824 (left homolog)                                                                                                  | This study                                |
| pAC-D95k-RE                     | pACYC-aac-loxRE with a DNA fragment of JCM 6824 (right homolog)                                                                                                 | This study                                |
| pSLE-R09T1                      | pK18mobsacB-loxLE with left homolog of T1                                                                                                                       | This study                                |
| pCRE-R09T1                      | pCH-cre-loxRE with right homolog of T1                                                                                                                          | This study                                |

**Table S1.** Bacterial strains and plasmids used in this study (continued)

| Strain or plasmid | Relevant characteristic(s)                    | Reference or origin |
|-------------------|-----------------------------------------------|---------------------|
| pK18-R09T2        | pK18mobsacB with left and right homolog of T2 | This study          |
| pSLE-R09T3        | pK18mobsacB-loxLE with left homolog of T3     | This study          |
| pCRE-R09T3        | pCH-cre-loxRE with right homolog of T3        | This study          |
| pSLE-R09T4        | pK18mobsacB-loxLE with left homolog of T4     | This study          |
| pCRE-R09T4        | pCH-cre-loxRE with right homolog of T4        | This study          |
| pSLE-R09T5        | pK18mobsacB-loxLE with left homolog of T5     | This study          |
| pCRE-R09T5        | pCH-cre-loxRE with right homolog of T5        | This study          |
| pSLE-R09T6        | pK18mobsacB-loxLE with left homolog of T6     | This study          |
| pCRE-R09T6        | pCH-cre-loxRE with right homolog of T6        | This study          |
| pSLE-R09T7        | pK18mobsacB-loxLE with left homolog of T7     | This study          |
| pCRE-R09T7        | pCH-cre-loxRE with right homolog of T7        | This study          |

\*Replicable vector in *Rhodococcus*

JCM, Japan Collection of Microorganisms

Amp<sup>r</sup>, ampicillin resistance; Cm<sup>r</sup>, chloramphenicol resistance; Tet<sup>r</sup>, tetracycline resistance; Km<sup>r</sup>, kanamycin resistance; Apr<sup>r</sup>, Apramycin resistance; Thio<sup>r</sup>, thiostrepton resistance.

References for Table S1. (Each reference number here is identical to that of main text)

65. Kitagawa, W.; Ozaki, T.; Nishioka, T.; Yasutake, Y.; Hata, M.; Nishiyama, M.; Kuzuyama, T.; Tamura, T. Cloning and heterologous expression of the aurachin RE biosynthesis gene cluster afford a new cytochrome P450 for quinoline N-hydroxylation. *ChemBioChem* 2013, 14, 1085-1093, doi:10.1002/cbic.201300167.
38. Kitagawa, W.; Hata, M.; Sekizuka, T.; Kuroda, M.; Ishikawa, J. Draft genome sequence of *Rhodococcus erythropolis* JCM 6824, an aurachin RE antibiotic producer. *Genome Announcements* 2014, 2, doi:10.1128/genomeA.01026-14.
39. Kitagawa, W.; Mitsuhashi, S.; Hata, M.; Tamura, T. Identification of a novel bacteriocin-like protein and structural gene from *Rhodococcus erythropolis* JCM 2895, using suppression-subtractive hybridization. *J. Antibiot.* 2018, 71, 872-879, doi:10.1038/s41429-018-0078-3.
28. Kitagawa, W.; Hata, M. Complete genome sequence of *Rhodococcus erythropolis* JCM 2895, an antibiotic protein-producing strain. *Microbiol Resour Announc* 2022, e0068222, doi:10.1128/mra.00682-22.
56. Schafer, A.; Tauch, A.; Jager, W.; Kalinowski, J.; Thierbach, G.; Puhler, A. Small mobilizable multi-purpose cloning vectors derived from the *Escherichia coli* plasmids pK18 and pK19: selection of defined deletions in the chromosome of *Corynebacterium glutamicum*. *Gene* 1994, 145, 69-73.
58. Chang, A.C.; Cohen, S.N. Construction and characterization of amplifiable multicopy DNA cloning vehicles derived from the P15A cryptic miniplasmid. *J. Bacteriol.* 1978, 134, 1141-1156, doi:10.1128/jb.134.3.1141-1156.1978.
41. Nakashima, N.; Tamura, T. A novel system for expressing recombinant proteins over a wide temperature range from 4 to 35 degrees C. *Biotechnol. Bioeng.* 2004, 86, 136-148.
44. Nakashima, N.; Tamura, T. Isolation and characterization of a rolling-circle-type plasmid from *Rhodococcus erythropolis* and application of the plasmid to multiple-recombinant-protein expression. *Appl. Environ. Microbiol.* 2004, 70, 5557-5568.
59. Nakashima, N.; Tamura, T. Conditional gene silencing of multiple genes with antisense RNAs and generation of a mutator strain of *Escherichia coli*. *Nucleic Acids Res.* 2009, 37, doi:ARTN e103 10.1093/nar/gkp498.

**Table S2.** Primers used in this study

| Primer      | Usage                                                                              | Sequence (5'–3')                   |
|-------------|------------------------------------------------------------------------------------|------------------------------------|
| R09CPD-F1   | Construction of pK18R09CPD1                                                        | ATATAGAATTCGGTTGAAGGTGGAAGCGAC     |
| R09CPD-R1   | Construction of pK18R09CPD1                                                        | TATTATCTAGACGGGTATTGCAGCGATTCC     |
| R09LPD-F01  | Construction of pK18R09LPD01                                                       | ATATAGAATTCCTTCTGGGAGTTCGTCGACC    |
| R09LPD-R01  | Construction of pK18R09LPD01                                                       | TATTATCTAGACATCAAGCGCTCCACATCC     |
| REC01D-F    | Construction of pK18R09REC01D                                                      | ATATAGAATTCGAGGCCTGACCTAGAAACTCC   |
| REC01D-R    | Construction of pK18R09REC01D                                                      | TATTATCTAGAAACAAAGCCATATCAGGTATCC  |
| REC02D-F    | Construction of pK18R09REC02D                                                      | ATATAGAATTCATGACTGGACCACAGGAGAG    |
| REC02D-R    | Construction of pK18R09REC02D                                                      | TATTATCTAGACTGTGACTCAGTTCACACCTGC  |
| 95k-LE-F2   | Construction of pBS-D95k-LE                                                        | TCAAGTTCTAGAGCAAGAAGATCAAGCCCGAG   |
| 95k-LE-R    | Construction of pBS-D95k-LE                                                        | TCAAGTGCATGCCGCTCTGTTGACCATGATG    |
| 95k-RE-F    | Construction of pAC-D95k-RE                                                        | TCAAGTACTAGTGATACCGAGTGCAGCAAG     |
| 95k-RE-R2   | Construction of pAC-D95k-RE                                                        | TCAAGTCCTGCAGGAACATGCAAAGCCACCGTAG |
| R09T1-1F    | Construction of pSLE-R09T1                                                         | AAAAAATCTAGAGGGCAATCAAGTCGACGATG   |
| R09T1-1R    | Construction of pSLE-R09T1                                                         | AAAAAAAAGCTTCATGTGCACTACCAGATCGC   |
| R09T1-2F    | Construction of pCRE-R09T1                                                         | AAAAAACTAGTACCCATTCTGTCCGGTATCC    |
| R09T1-2R    | Construction of pCRE-R09T1                                                         | AAAAAACCTGCAGGTCGGAAGGAGTGAAGTGGTC |
| R09T2-1F    | Construction of pK18-R09T2 and double crossover detection                          | AAAAAAGAATTCGCGACGATCCACTGATTCAC   |
| R09T2-1R    | Construction of pK18-R09T2                                                         | AAAAAATCTAGACAGCGCAGAATAAGTGGTCC   |
| R09T2-2F    | Construction of pK18-R09T2                                                         | AAAAAATCTAGAGACACAATAGGCTGCTCACG   |
| R09T2-2R    | Construction of pK18-R09T2 and double crossover detection                          | AAAAAAAAGCTTCGGATGGATCAGATCAACGC   |
| R09T3-1F    | Construction of pSLE-R09T3                                                         | AAAAAATCTAGACACTGAAATGGGTGTGGCTC   |
| R09T3-1R    | Construction of pSLE-R09T3                                                         | AAAAAAAAGCTTCACGACCAGAGCAATCGATC   |
| R09T3-2F    | Construction of pCRE-R09T3                                                         | AAAAAACTAGTATGGAAGCGTGTATCGTTG     |
| R09T3-2R    | Construction of pCRE-R09T3                                                         | AAAAAACCTGCAGGCAACTGATTCCGACGGCATC |
| R09T4-1F    | Construction of pSLE-R09T4                                                         | AAAAAATCTAGAAAGAGAATCATCAACGCGCC   |
| R09T4-1R    | Construction of pSLE-R09T4                                                         | AAAAAACTGCAGCCAGCGGTGATATCCAAACG   |
| R09T4-2F    | Construction of pCRE-R09T4                                                         | AAAAAACTAGTAAGCAGCGTTGAGAATTCCC    |
| R09T4-2R    | Construction of pCRE-R09T4                                                         | AAAAAACCTGCAGGCCGAAATTCCCACGTCATG  |
| R09T5-1F    | Construction of pSLE-R09T5                                                         | AAAAAATCTAGATCGATTGTCTCGAACCCTG    |
| R09T5-1R    | Construction of pSLE-R09T5                                                         | AAAAAACCTGCAGGACCTCACTCAAATCCCGCAC |
| R09T5-2F    | Construction of pCRE-R09T5                                                         | AAAAAACTAGTTCAAGCCCGTCCCTGAAATC    |
| R09T5-2R    | Construction of pCRE-R09T5                                                         | AAAAAACCTGCAGGAAGAGTGGCACGAACCTGA  |
| R09T6-1F    | Construction of pSLE-R09T6                                                         | AAAAAATCTAGACGACCGTTTCATCGCGAATC   |
| R09T6-1R    | Construction of pSLE-R09T6                                                         | AAAAAACCTGCAGGGATGTACTCGAGCTACCCG  |
| R09T6-2F    | Construction of pCRE-R09T6                                                         | AAAAAACTAGTTGTTGGTGCTTTGTTGCTCG    |
| R09T6-2R    | Construction of pCRE-R09T6                                                         | AAAAAACCTGCAGGAGTGCATCGCTCATCAGTC  |
| R09T7-1F    | Construction of pSLE-R09T7                                                         | AAAAAAGAATTCGAGAAGAGGATCGCGGTGAG   |
| R09T7-1R    | Construction of pSLE-R09T7                                                         | AAAAAATCTAGACCCGATAGCTCCAGAACGAC   |
| R09T7-2F    | Construction of pCRE-R09T7                                                         | AAAAAACTAGTCTTGGCGCCGTACATCATTG    |
| R09T7-2R    | Construction of pCRE-R09T7                                                         | AAAAAACTAGTGTCCCAAGGCTCCATGAGTG    |
| aphII-UR    | Single crossover detection, hybridize to kanamycin resistant gene ( <i>aphII</i> ) | ATCCATCTTGTTCAATCATGCG             |
| R09CPD-SCC1 | pK18R09CPD1 single crossover detection                                             | GGATGCAGTCAAGATCGTCG               |
| R09CPD-F2   | pR09C01 detection                                                                  | ATATAGAATTCCTTCCACTTGACGTCCTCCC    |

**Table S2.** Primers used in this study (continued)

| Primer         | Usage                                                                                                          | Sequence (5'–3')               |
|----------------|----------------------------------------------------------------------------------------------------------------|--------------------------------|
| R09CPD-R2      | pR09C01 detection                                                                                              | TAATATCTAGACCACACCAGCATCAACACC |
| R09LPD-SCCF1   | pK18R09LPD1 single crossover detection                                                                         | GGAAACGGGAGGTGTTGTG            |
| R09LPD-F02     | pR09L01 detection                                                                                              | ATATAGAATTCAACTTCGGGACTCCATGGG |
| R09LPD-R02     | pR09L01 detection                                                                                              | TATTATCTAGACGAACCATTCACGCTCAC  |
| R09REC01-SCCF  | pK18R09REC01D single crossover detection                                                                       | GCCTGTTCTTCCTCAGCAAC           |
| REC01-F02      | pREC01 detection                                                                                               | GCGTCGGACTCGAATAGTTG           |
| REC01-R02      | pREC01 detection                                                                                               | TCTCGCATCGTATGTTTCGTC          |
| R09REC02-SCCF  | pK18R09REC02D single crossover detection                                                                       | TTATGCGATGCGACTTTGTC           |
| REC02-F02      | pREC02 detection                                                                                               | GCAGTTCCAGAAGCAGAAGG           |
| REC02-R02      | pREC02 detection                                                                                               | TTTACGGATCGCTTGTTTCC           |
| D95k-LE-CF     | pBS-D95k-LE single crossover detection                                                                         | ACACCTACGACATCAGCGAC           |
| LE-DR          | pBS-D95k-LE, pSLE-R09T1, pCRE-R09T3, pSLE-R09T4, pSLE-R09T5, pSLE-R09T6, pSLE-R09T7 single crossover detection | CTGCAAGGCGATTAAAGTTGGG         |
| RE-UF          | pAC-D95k-RE single crossover detection                                                                         | CCAGCAATAGACATAAGCGGC          |
| D95k-RE-CR     | pAC-D95k-RE single crossover detection                                                                         | GAGGGTCTTCGTGTTGTGTG           |
| R09T1-FF       | pSLE-R09T1 single crossover detection and T1 reduction detection                                               | CGACAAGGCGAAGTGGTATG           |
| pTCLR-2917-F   | pCRE-R09T1, pCRE-R09T3, pCRE-R09T4, pCRE-R09T5, pCRE-R09T6, pCRE-R09T7 single crossover detection              | TGGGCGAGATGTACGTGTC            |
| R09T1-RR       | pCRE-R09T1 single crossover detection and T1 reduction detection                                               | GTCATCCGAATCTTGCTCCG           |
| 18MCS-FF       | pk18-R09T2 single crossover detection                                                                          | CTTCCGGCTCGTATGTTGTG           |
| R09T2-singleC1 | pk18-R09T2 single crossover detection                                                                          | AAACATCGCAGCTTCCCTTG           |
| R09T2-singleC2 | pk18-R09T2 single crossover detection                                                                          | TTGATTGCCCAACTGTCAGC           |
| R09T3-FF       | pSLE-R09T3 single crossover detection and T3 reduction detection                                               | TGATGATTCTCGCCGCCTAC           |
| R09T3-RR       | pCRE-R09T3 single crossover detection and T3 reduction detection                                               | GATTCTGGGAACGCGACTTC           |
| R09T4-FF       | pSLE-R09T4 single crossover detection and T4 reduction detection                                               | CAACGATGAACACACCCTGG           |
| R09T4-RR       | pCRE-R09T4 single crossover detection and T4 reduction detection                                               | GATTTCGAACCAAGCCCGG            |
| R09T5-FF       | pSLE-R09T5 single crossover detection and T5 reduction detection                                               | TCGAAGTTGAAGTCTCCGCC           |
| R09T5-RR       | pCRE-R09T5 single crossover detection and T5 reduction detection                                               | AGTTCACGTACTACCGCGTC           |
| R09T6-FF       | pSLE-R09T6 single crossover detection and T6 reduction detection                                               | GGTTACAGCCAGTCCCAGTC           |
| R09T6-RR       | pCRE-R09T6 single crossover detection and T6 reduction detection                                               | TGGACATCGTCGGTCATTCC           |
| R09T7-FF       | pSLE-R09T7 single crossover detection and T7 reduction detection                                               | TGATCTGCGTCAGGTGATCG           |
| R09T7-RR       | pCRE-R09T7 single crossover detection and T7 reduction detection                                               | TCTTCGGTGATCCACAGACG           |

**Figure S1. Determination of genome reduction target position (T1–T7) of *R. erythropolis* JCM 2895 by comparing genome sequence of four other *R. erythropolis* strains.** Chromosomal DNA sequence of JCM 2895 (horizontal axis) was compared with JCM 6825, NBRC 100887 (PR4), DSM 11397, and JCM 6824 (vertical axis) by GenomeMatcher software. The figures of independent comparison were overlaid to identify JCM 2895 specific DNA region among them. The red line indicates identical/nearly identical region between them, and horizontal break indicates JCM 2895 specific DNA region. The specific DNA region over 5-kb in size were selected for the target of genome reduction (T1–T7).

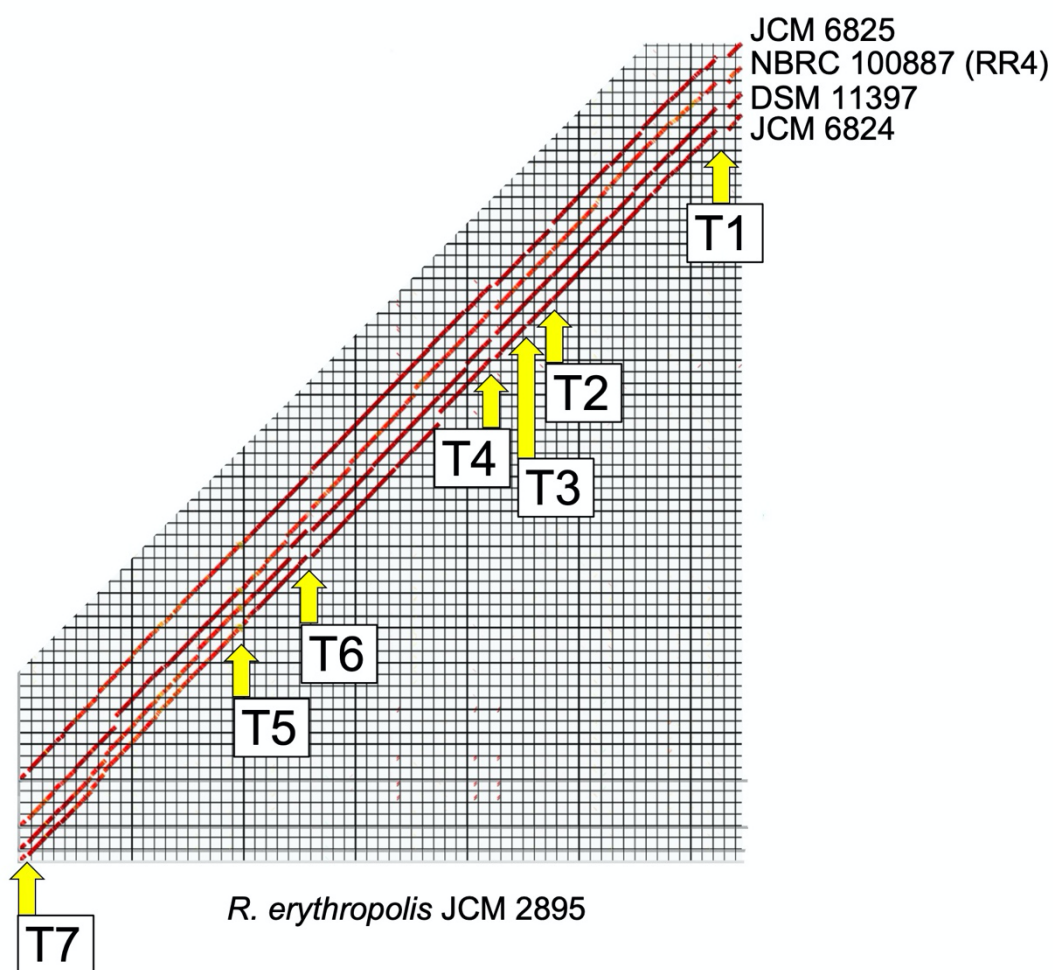

**Figure S2. Cre recombination between chromosomal *loxLE* and plasmid *loxRE*.** If a leaky promoter was used for *cre* expression, even if the level was very low, the recombination would happen between chromosome and plasmid, before the single crossover of 2nd vector, since the Cre recombinase is highly active. In that case, the whole 2nd vector DNA sequence would be integrated at *loxLE* site, and the genome reduction would end in failure. The two *lox* mutant sequence, *loxLR* and *loxRL* (the hybrid sequence of *loxLE* and *loxRE*) remains on the chromosome.

1st vector integration (single crossover)

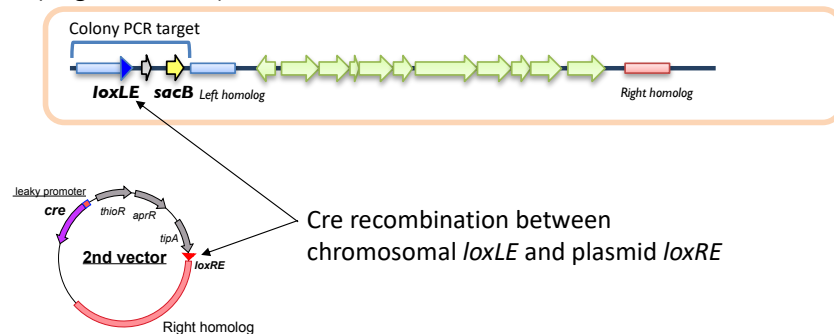

2nd vector integration (Cre mediated recombination)

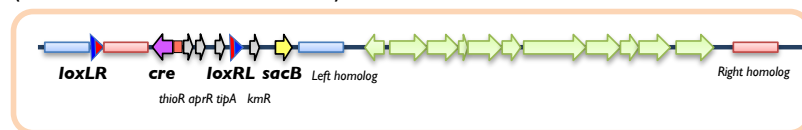

Supplement: s1 [file s1]
